# Supplementary material for: Consuming viscous prey: a novel protein-secreting delivery system in neotropical snail-eating snakes
Source: PubMed Central journal article supplement (PMC4021269; doi:10.1186/1471-2148-14-58), 2014-03-25

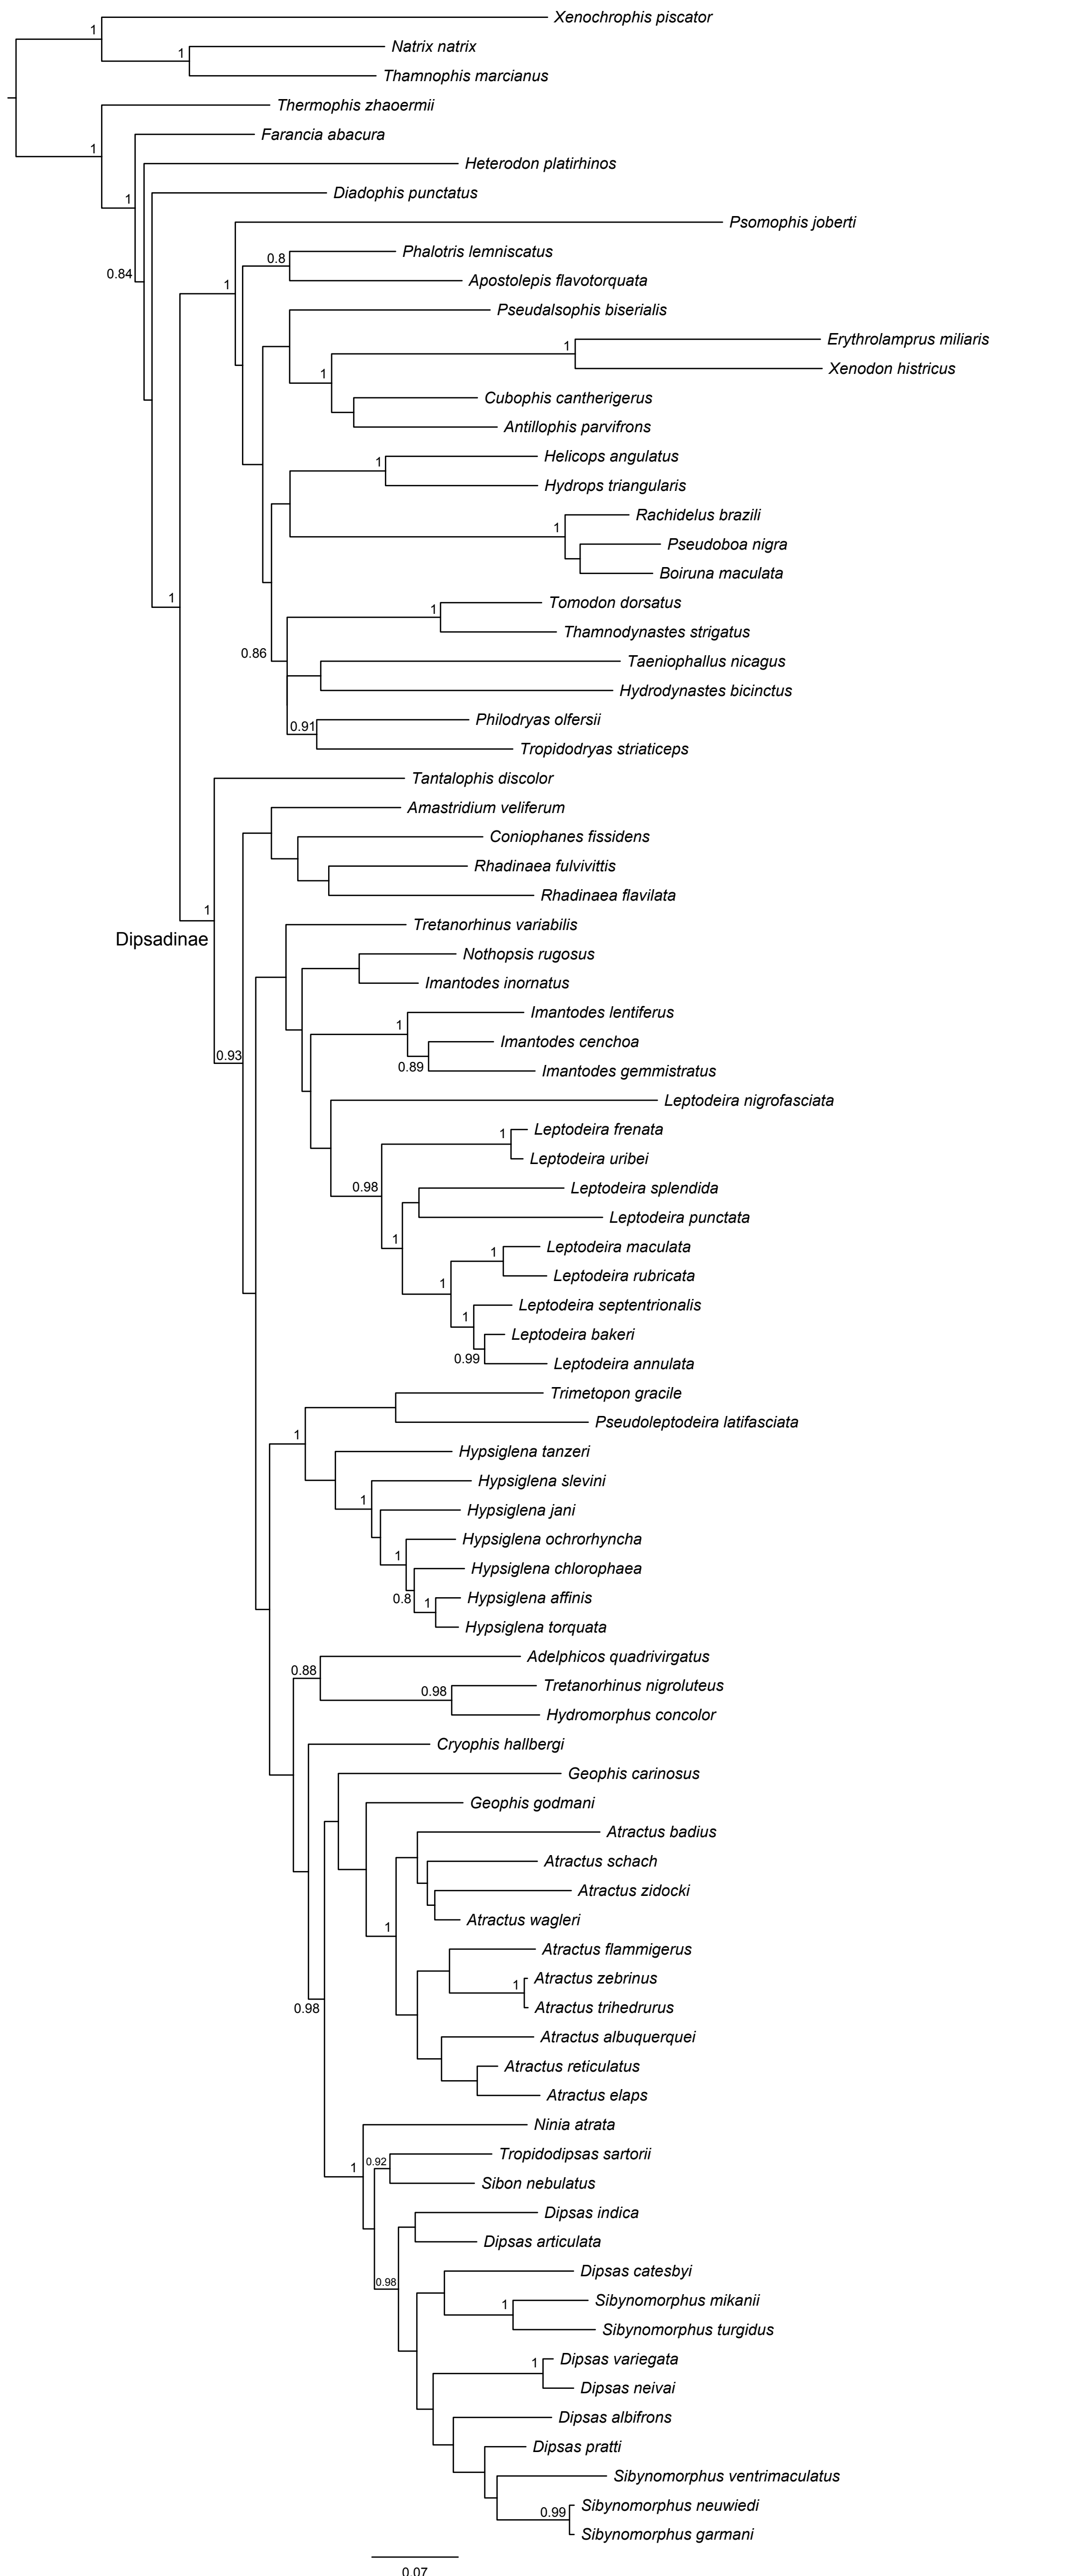

Supplement: 1471-2148-14-58-S4.pdf [file 1471-2148-14-58-S4.pdf]
